# Supplementary material
Source: publisher figshare collection journal article supplement (https://gsajournals.figshare.com/ndownloader/files/17869259)
Supplement: Supplementary file 1 [file 17869259]

**Supplementary Information 2**

Number of SNPs selected when SNPs were sampled randomly, without replacement, within each chromosome.

**Table S1. SNP counts for each HD SNP panel**

| **Target HD density** | **Selected SNPs count** |
| --- | --- |
| **200** | 216 |
| **300** | 312 |
| **400** | 414 |
| **500** | 512 |
| **600** | 614 |
| **700** | 716 |
| **800** | 815 |
| **900** | 914 |
| **1000** | 1012 |
| **2000** | 2013 |
| **5000** | 5013 |
| **10000** | 10014 |
| **60000** | 58678 |

**Table S2. SNP counts for each LD SNP panel for imputation**

| **Target LD density** | **Selected SNPs count** |
| --- | --- |
| **200** | 218 |
| **300** | 312 |
| **400** | 416 |
| **500** | 512 |
| **600** | 614 |
| **700** | 718 |
| **800** | 817 |
| **900** | 914 |
| **1000** | 1014 |
